# Supplementary material for: Extremely low-efficiency roll-off of phosphorescent organic light-emitting diodes at high brightness based on acridine heterocyclic derivatives
Source: Royal Society of Chemistry journal article supplement (doi:10.1039/c8tc02739k), 2018-01-01
Supplement: c8tc02739k1.pdf [file c8tc02739k1.pdf]

## Electronic Supplementary Information

Extremely low efficiency roll-off of phosphorescent organic light-emitting diodes at high-brightness based on acridine heterocyclic derivatives

Minyu Chen<sup>‡a</sup>, Jiali Yang<sup>‡a</sup>, Zhonghua Ye<sup>b</sup>, Shuanglong Wang<sup>a</sup>, Zhenyu Tang<sup>a</sup>, Kuoping Guo<sup>a</sup>, Guo Chen<sup>a</sup>, Yanqiong Zheng<sup>a</sup>, Ying Shi<sup>b\*</sup>, Bin Wei<sup>a\*</sup>, Wai-Yeung Wong<sup>c\*</sup>

<sup>a</sup> *School of Mechatronic Engineering and Automation, Key Laboratory of Advanced Display and System Applications, Ministry of Education, Shanghai University, 149 Yanchang Road, Shanghai, 200072, P. R. China.*

<sup>b</sup> *School of Materials Science and Engineering, Shanghai University, Shanghai 200072, P. R. China.*

<sup>c</sup> *Department of Applied Biology and Chemical Technology, The Hong Kong Polytechnic University, Hung Hom, Hong Kong, P. R. China.*

<sup>‡</sup>These authors contributed equally to this work

\*Email - bwei@shu.edu.cn

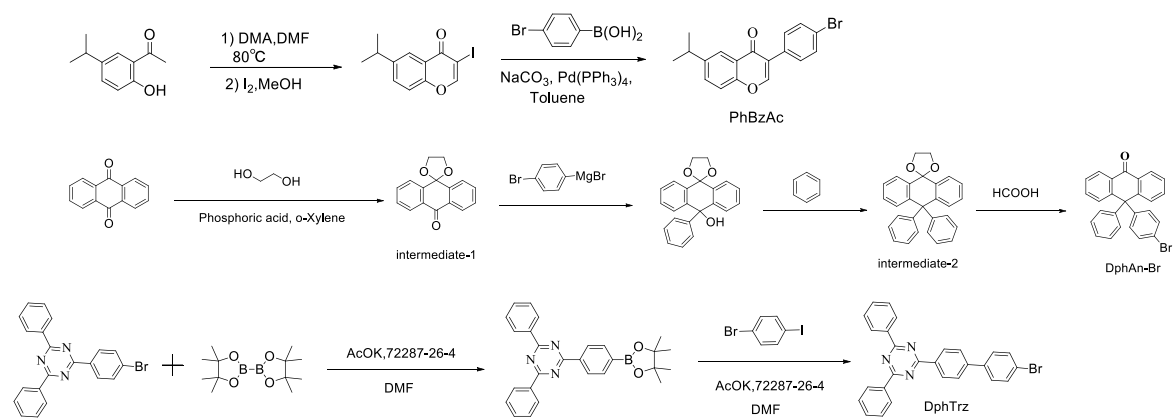

**Scheme. S1** Synthesis of intermediates and ancillary ligands

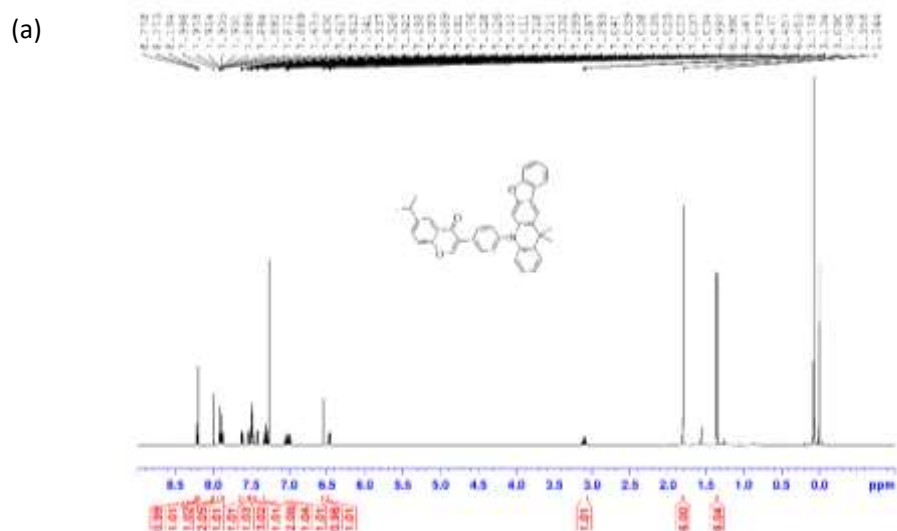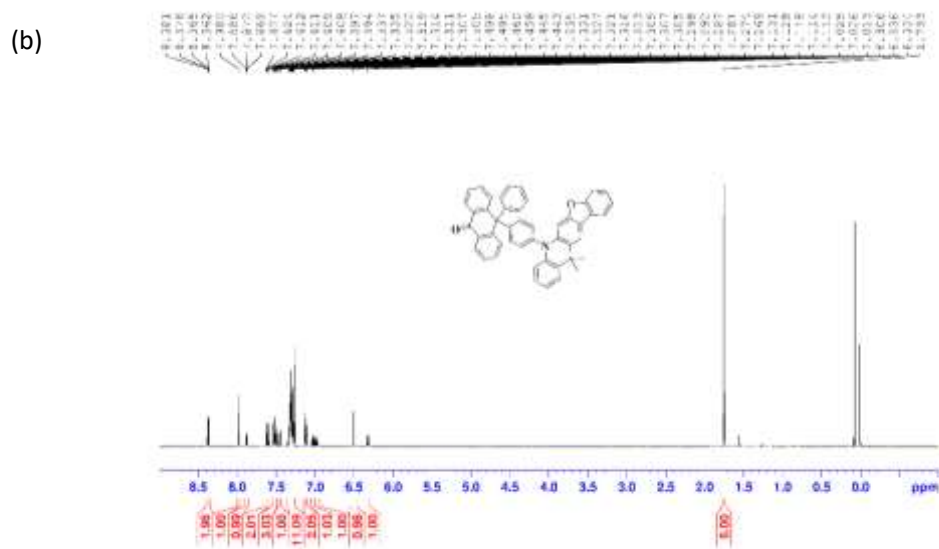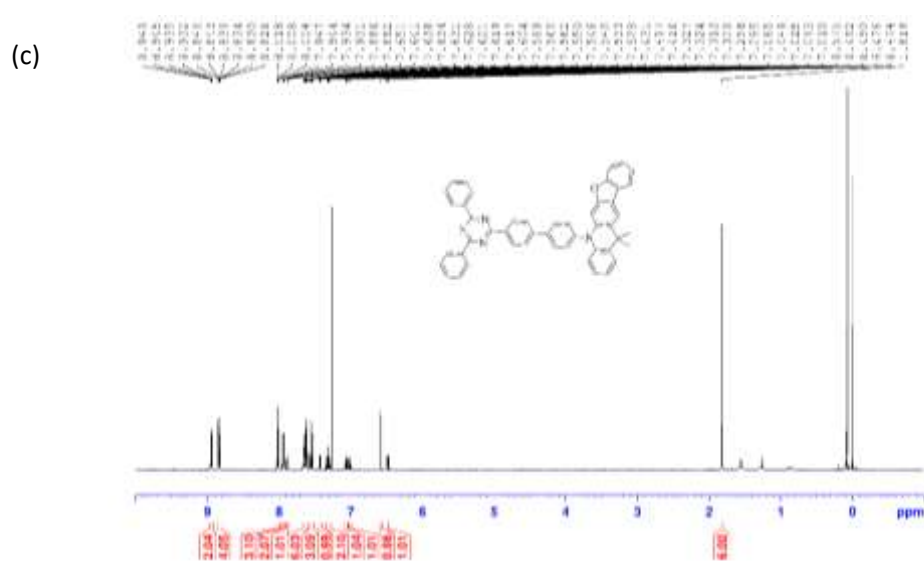

**Fig. S1**  $^1\text{H}$  NMR spectra of IpCm-PhBzAc (a), DpAn-BzAc (b) and DpTrz-BphBzAc (c).

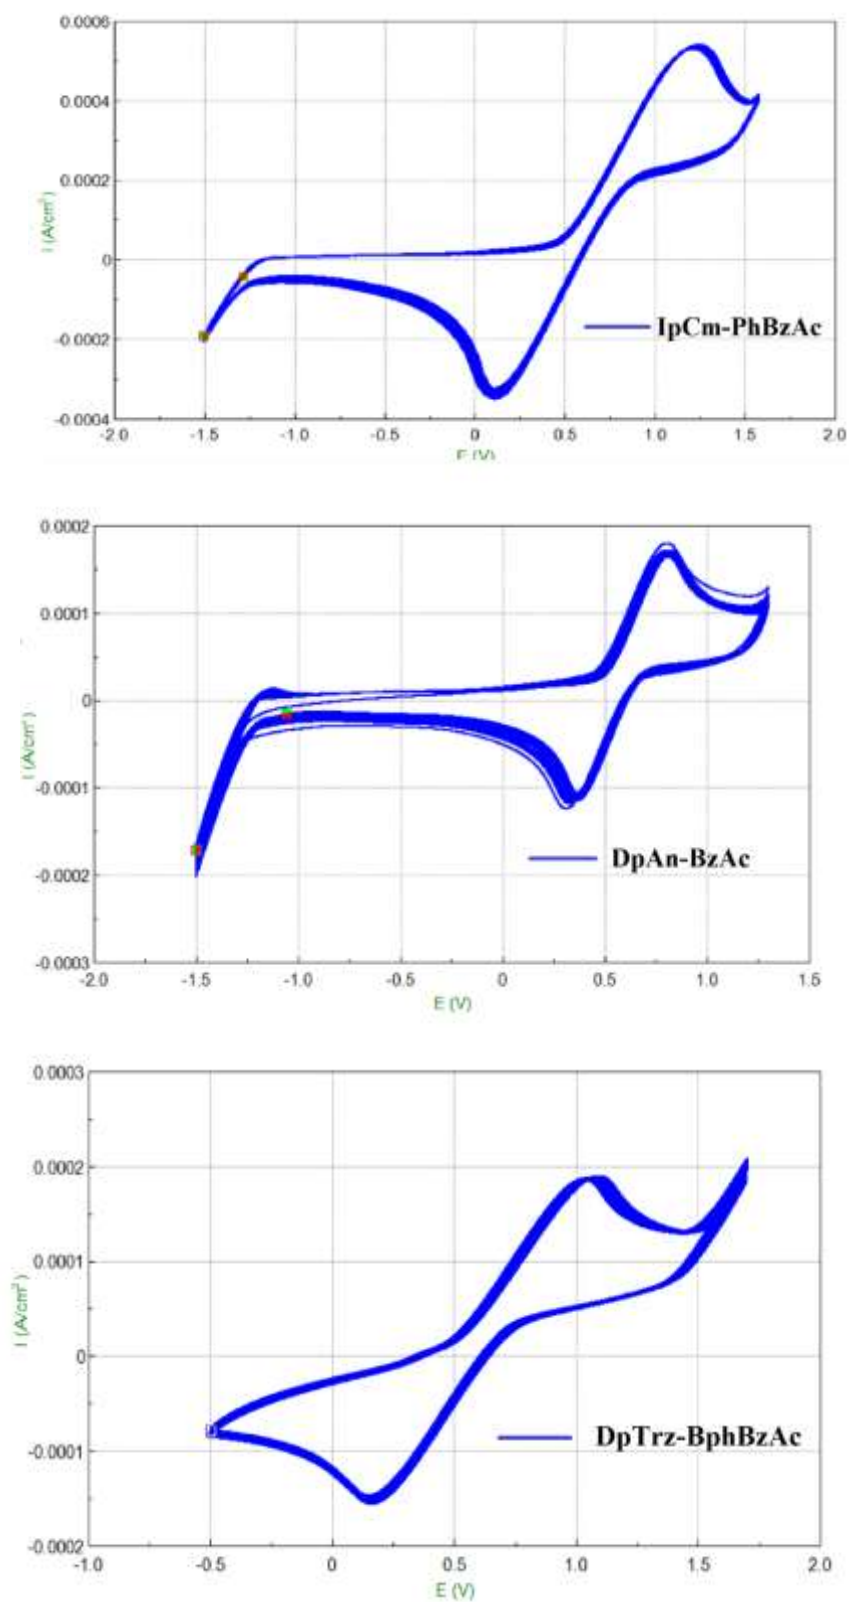

**Fig. S2** Cyclic voltammograms of IpCm-PhBzAc, DpAn-BzAc and DpTrz-BphBzAc

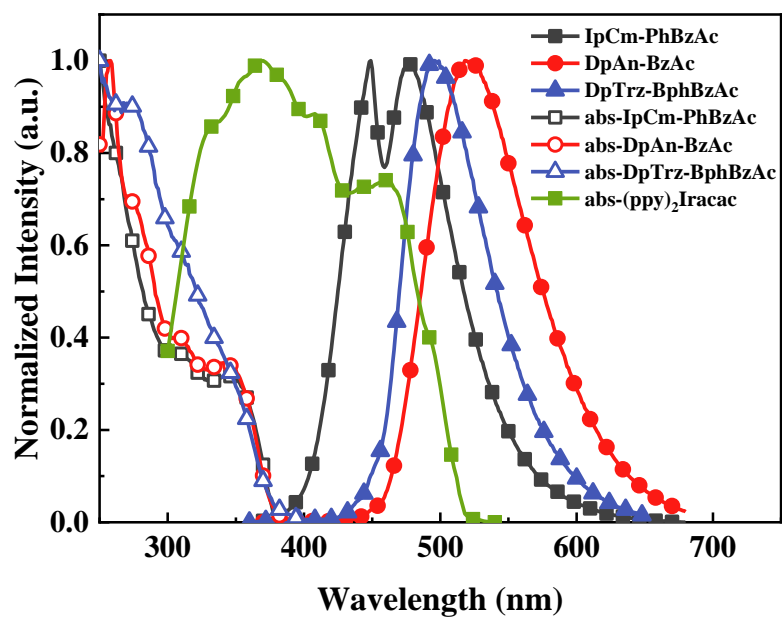

**Fig. S3** UV-vis absorption (Abs) and PL spectra of three host materials and Ir complex in thin solid film at room temperature and low temperature

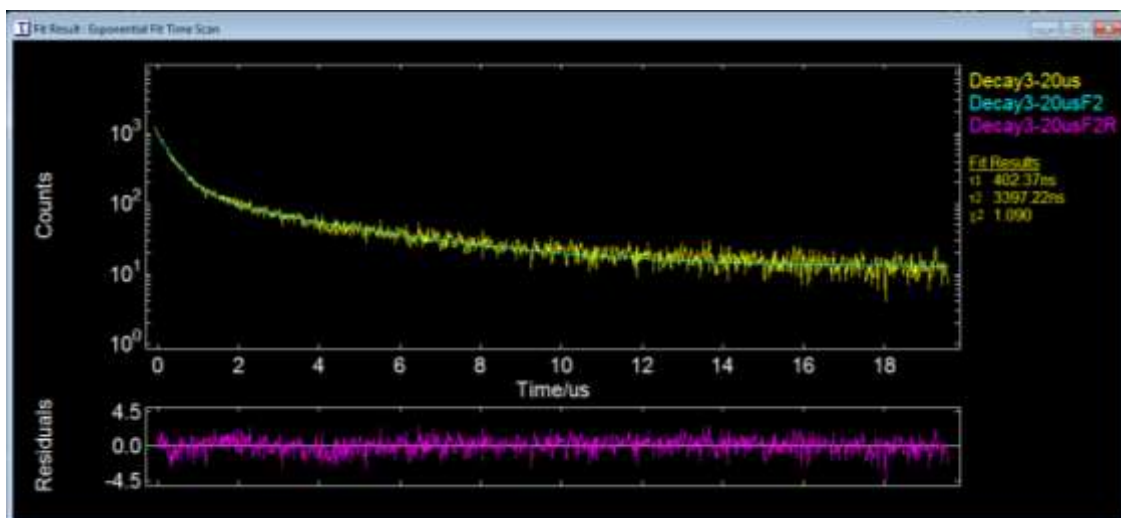

**Fig. S4** The testing and fit results of delayed lifetime of DpAn-BzAc.

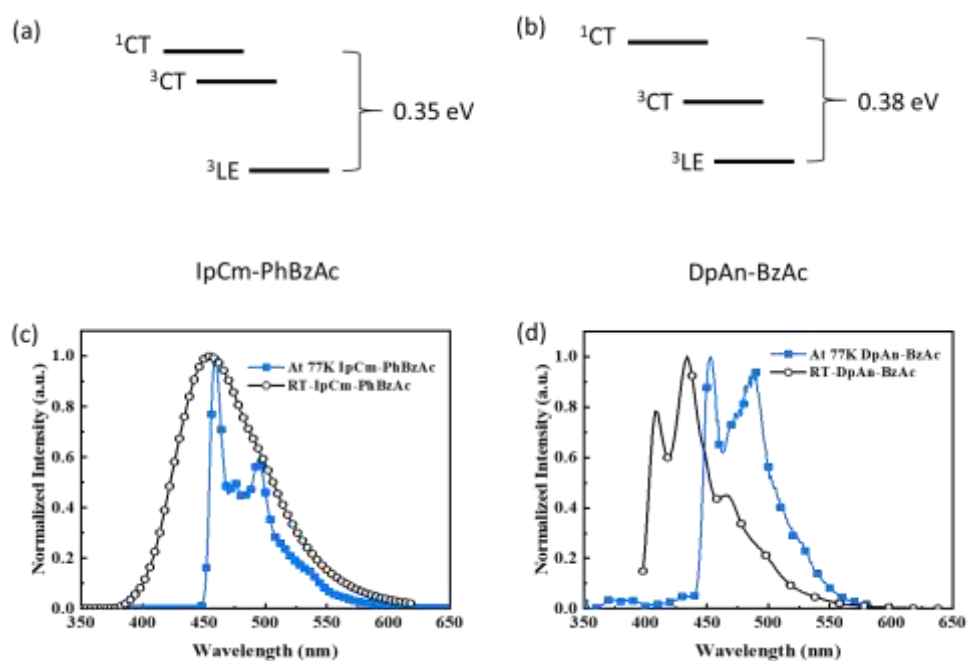

**Fig. S5** The excited state energies of  $^1\text{CT}$ ,  $^3\text{CT}$  and  $^3\text{LE}$  states of IpCm-PhBzAc (a) and DpAn-BzAc (b); The fluorescence (black line) and phosphorescence (blue line) spectra of IpCm-PhBzAc (c) and DpAn-BzAc (d) in toluene at room temperature and 77K, respectively.

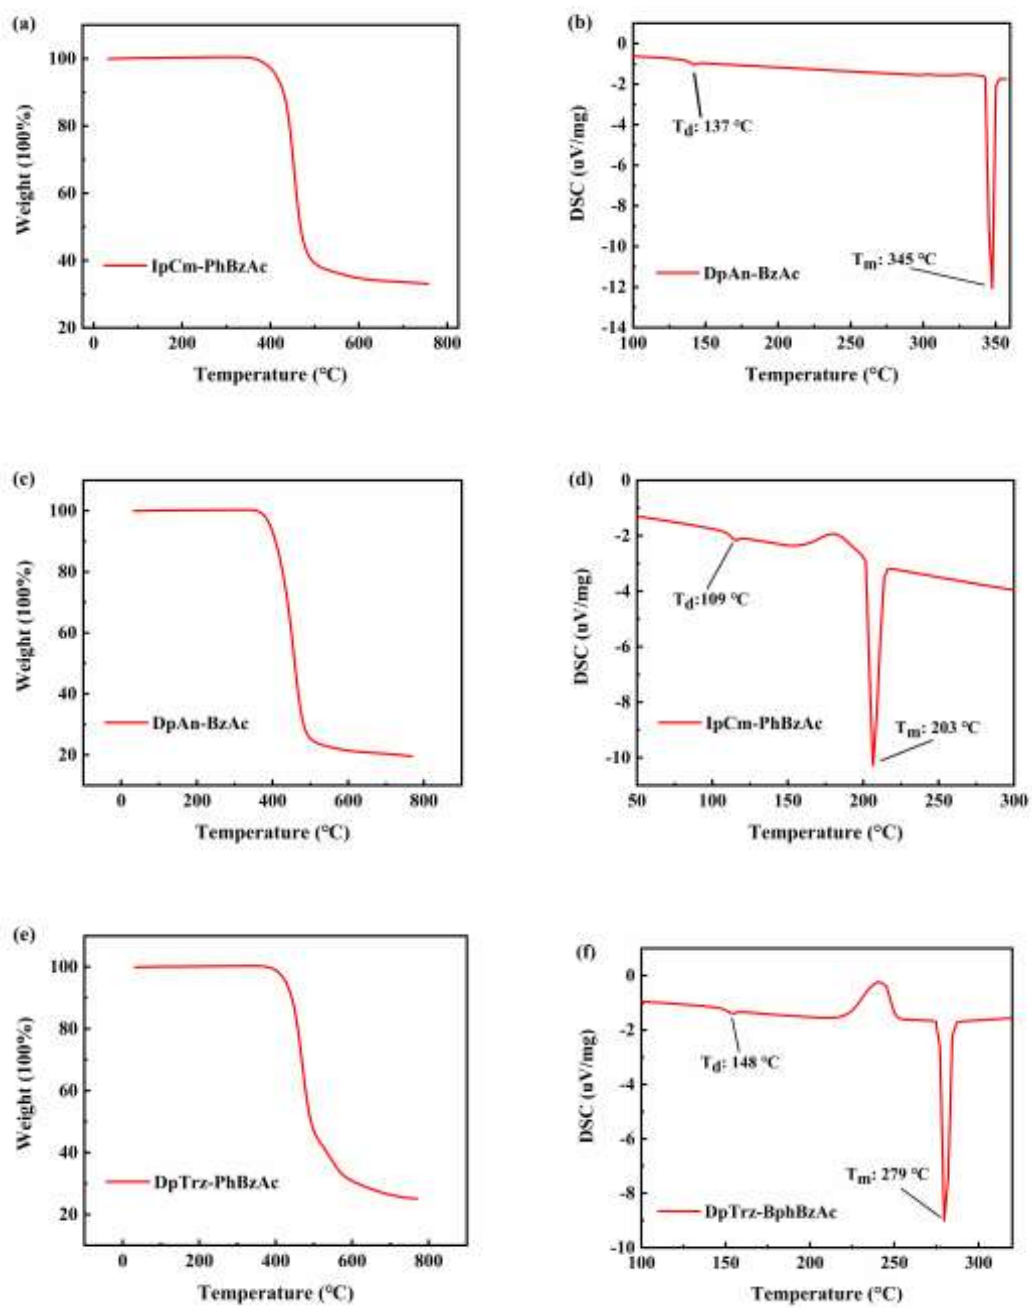

**Fig. S6** TGA (left) and DSC (right) images of IpCm-PhBzAc (a,b), DpAn-BzAc (c,d) and DpTrz-BphBzAc (e,f).



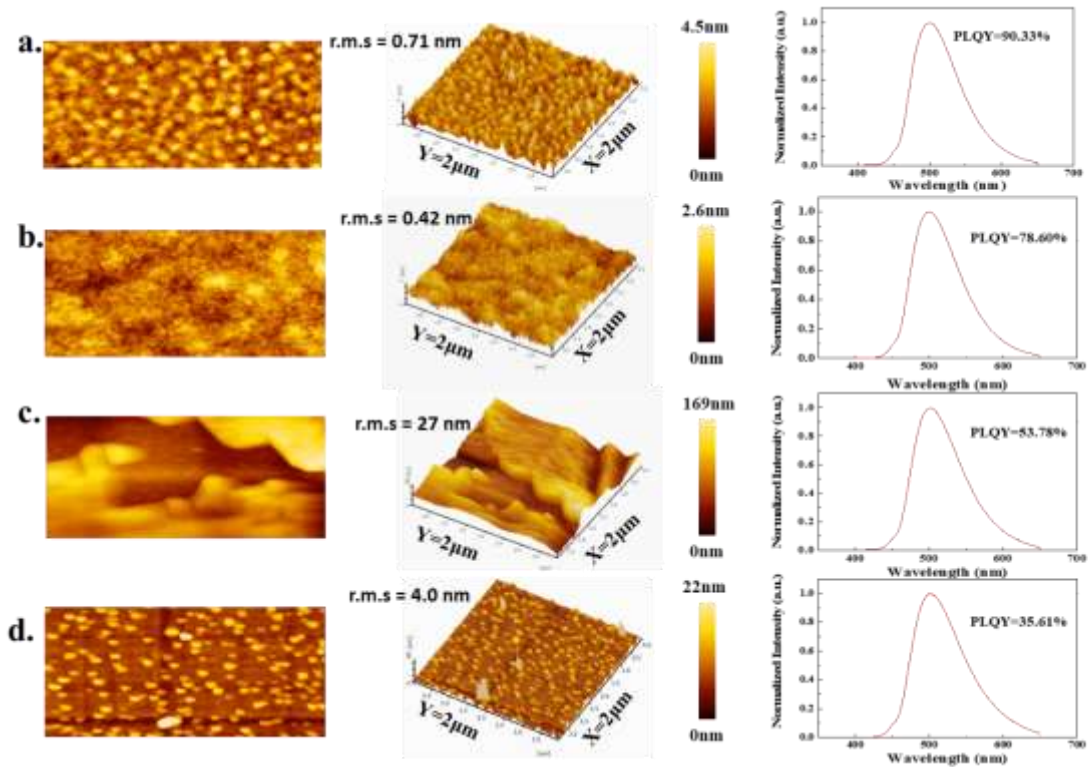

**Fig. S7** (a-d) AFM characterization and PL spectra. Height images (left), three-dimensional images (middle) and PL spectra (right) of DpAn-BzAc films at room temperature (a) and under 100 °C (b), 200 °C (c), 300 °C (d) annealing temperatures (20 minutes).

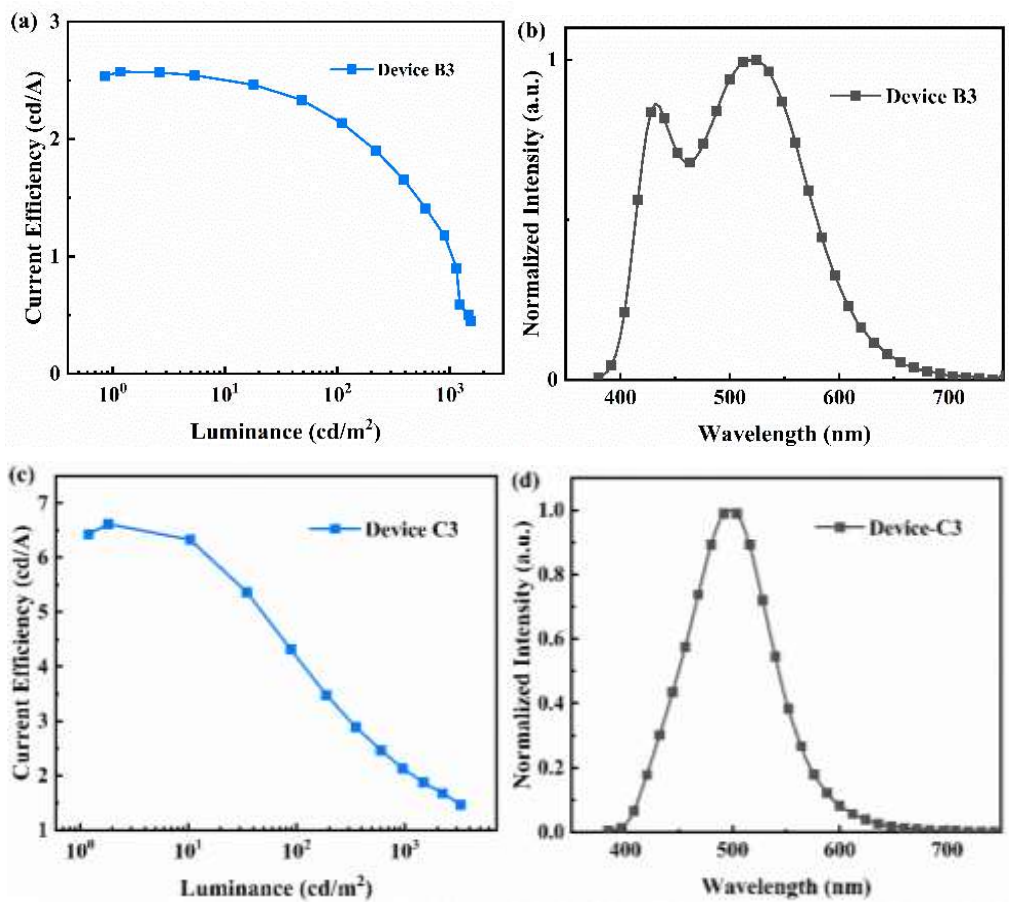

**Fig. S8** The current efficiency (left) and normalized EL spectra (right) of Device B3 (a,b) and Device C3 (c,d).
